# Supplementary material
Source: PubMed Central journal article supplement (PMC2762680)
Supplement: 0909296106_0909296106SI.pdf [file 0909296106_0909296106SI.pdf]

# Supporting Information

Chen et al. 10.1073/pnas.0909296106

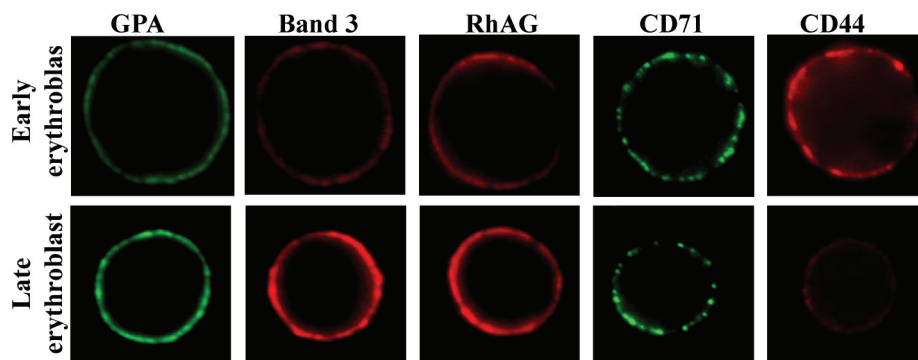

**Fig. S1.** Immunofluorescence images of surface expression of various transmembrane proteins in early and late stage erythroblasts. Representative images of primary mouse bone marrow early and late stage erythroblasts stained with specific antibodies against GPA, band 3, RhAG, CD44, and CD71 are shown. Note the increased expression of GPA, band 3, and RhAG during differentiation, the decreased expression of CD44, and the similar levels of expression of CD71 in early and late stage erythroblasts.

**Table S1. Expression of surface markers during erythropoiesis**

| Proteins    | 0 h, mean<br>fluorescence | 12 h, mean<br>fluorescence | 24 h, mean<br>fluorescence | 44 h, mean<br>fluorescence |
|-------------|---------------------------|----------------------------|----------------------------|----------------------------|
| CD71        | 6,700 ± 100               | 26,000 ± 730               | 22,000 ± 450               | 6,500 ± 180                |
| GPA         | 1,000 ± 80                | 1,800 ± 50                 | 3,500 ± 130                | 3,700 ± 100                |
| Kell        | 1,300 ± 15                | 1,600 ± 30                 | 1,600 ± 40                 | 1,170 ± 30                 |
| β1 integrin | 2,500 ± 130               | 2,880 ± 180                | 2,360 ± 140                | 760 ± 25                   |
| CD44        | 8,900 ± 400               | 4,870 ± 160                | 2,070 ± 40                 | 270 ± 10                   |
